# Supplementary material for: Efficacy and tolerability of the investigational topical cream SD-101 (6% allantoin) in patients with epidermolysis bullosa: a phase 3, randomized, double-blind, vehicle-controlled trial (ESSENCE study)
Source: Orphanet J Rare Dis. 2020 Jun 23;15:158. doi: 10.1186/s13023-020-01419-3 (PMC7310548; doi:10.1186/s13023-020-01419-3)
Supplement: Supplementary file 1 — Additional file 1:. ESSENCE individual patient data. Contains individual de-identified participant data regarding the target wound from the current study. [file 13023_2020_1419_MOESM1_ESM.xlsx]

## Sheet: Report 1 - Detailed and-or s
ESSENCE Study (NCT02384460)
Listing of By-Patient Results
Safety Population
Subject Number	Gender	Age at baseline	Sub-type	Treatment	Baseline Target Wound Size	Age of Target Wound at Baseline (Day)	Location of Target Wound	Baseline BSA of Wounds	Patient Completion	Target Wound Size at Baseline	Target Wound Size at Week 2	Target Wound Size at Month 1	Target Wound Size at Month 2	Target Wound Size at Month 3	Target Wound Healing	BSA of Wounds at Week 2	BSA of Wounds at Month 1	BSA of Wounds at Month 2	BSA of Wounds at Month 3	BSA of Wounds at Month 3
1	F	5	SIMPLEX	Placebo	12.9	30	Left Lumbar Region	0.654	Completed	12.9	14	14.7	11.7	.	Target Wound complete closure at Month 3	12.2	5.2	5.9	10.4	10.1
2	F	2	SIMPLEX	SD-101-6.0	14.9	28	Left foot, dorsum	0.263	Completed	14.9	8	6.7	3.6	0.4		1.2	1.1	0.8	0.65	0.9
3	F	8	RECESSIVE DYSTROPHIC	Placebo	11.5	55	Left Thoracic Region	0.869	Completed	11.5	9.7	3.5	2.7	1.6		16.5	21	14	18.3	14.5
4	M	4	RECESSIVE DYSTROPHIC	SD-101-6.0	17.6	1513	Right Medial Knee	0.592	Completed	17.6	8.2	3	6.7	2.8		12.4	7.9	6.5	6.6	6.3
5	F	5	JUNCTIONAL NON-HERLITZ	Placebo	29.6	60	Left Anterior Shin	0.635	Completed	29.6	10.6	10.2	1.4	2.7		36.6	24	23.7	10.7	13.9
6	F	1	RECESSIVE DYSTROPHIC	SD-101-6.0	10.9	365	Left Posterior Ankle	0.481	Completed	10.9	3.7	6.5	4.9	2.8		2	1.8	1.8	1.5	1.5
7	M	6	SIMPLEX	Placebo	27.5	97	Left Lumbar Region	0.347	Completed	27.5	12.1	10.4	.	.	Target Wound complete closure at Month 2	11.4	16.6	11.5	12.4	12.5
8	M	13	SIMPLEX	SD-101-6.0	21.7	42	Right Lateral foot	1.408	Completed	21.7	17.8	.	.	.	Target Wound complete closure at Month 1	4.2	1.9	1.4	0.9	1
9	M	10	SIMPLEX	SD-101-6.0	22.2	42	Right Lateral foot	1.016	Completed	22.2	6.9	7	1.1	2.3		4.5	1.7	1.65	1.2	1
10	F	7	RECESSIVE DYSTROPHIC	SD-101-6.0	14.1	41	Left elbow, posterior	0.392	Completed	14.1	0.2	0.1	0.2	.	Target Wound complete closure at Month 3	1.5	0.45	0.35	0.5	0.5
11	F	10	RECESSIVE DYSTROPHIC	Placebo	11.1	30	Right Medial Malleous	0.937	Completed	11.1	4.9	.	.	.	Target Wound complete closure at Month 1	2.2	1	1.8	1.8	2.6
12	F	4	SIMPLEX	Placebo	25.4	728	Left Anterior Knee	0.817	Completed	25.4	27.4	30.3	12	.	Target Wound complete closure at Month 3	8.6	11	8.4	12.6	13.6
13	F	1	RECESSIVE DYSTROPHIC	SD-101-6.0	10.3	50	Left Anterior Knee	0.408	Completed	10.3	10.4	5.8	6.4	5		3.3	2.4	2.2	1.4	1.6
14	M	3	RECESSIVE DYSTROPHIC	Placebo	24.8	42	Left Medial Malleous	0.644	Completed	24.8	1.5	11.2	.	.	Target Wound complete closure at Month 2	10.5	5.8	7.5	5.5	4
15	F	19	RECESSIVE DYSTROPHIC	Placebo	27.1	31	Right Anterior Thigh	1.21	Completed	27.1	.	.	.	.	Target Wound complete closure at Week 2	15.5	14.5	14	11.4	12.5
16	M	8	RECESSIVE DYSTROPHIC	SD-101-6.0	20	61	Left Thoracic Region	1.233	Completed	20	12.2	.	.	.	Target Wound complete closure at Month 1	14.45	13.45	10	8.5	14
17	F	4	RECESSIVE DYSTROPHIC	SD-101-6.0	21	1626	Left Anterior Shin	0.599	Completed	21	24.4	17.8	10.8	2.3		8.2	8.2	8.2	6.3	4.9
18	F	2	RECESSIVE DYSTROPHIC	Placebo	25.2	106	Left Lateral Forearm	0.45	Completed	25.2	10	.	.	.	Target Wound complete closure at Month 1	5.8	4.2	6.9	3.2	2.7
19	M	2	SIMPLEX	Placebo	15.3	57	Left medial malleolus	0.249	Discontinued	15.3	8	.	.	.		4.1	2.4	.	.	.
20	F	5	SIMPLEX	SD-101-6.0	26.1	59	Right Lateral Thigh	0.806	Completed	26.1	14.4	7.4	7.7	.	Target Wound complete closure at Month 3	17.7	14.7	12.7	6.9	7.5
21	M	4	RECESSIVE DYSTROPHIC	SD-101-6.0	10	21	Right Axilla	0.79	Completed	10	.	.	.	.	Target Wound complete closure at Week 2	2.2	1.4	1.2	2	2.9
22	F	4	RECESSIVE DYSTROPHIC	Placebo	10.1	371	Left Shin, medial	0.594	Completed	10.1	7.7	3.7	14.3	8.6		3.7	4.7	2.2	2.8	2.85
23	M	8	RECESSIVE DYSTROPHIC	Placebo	17.7	41	Left Lateral Thigh	0.915	Completed	17.7	19.9	3.1	23.8	40.8		21	23	29	18.5	23.5
24	M	6	RECESSIVE DYSTROPHIC	Placebo	10	23	Left Upper Arm, Lateral	0.806	Completed	10	0.4	.	.	.	Target Wound complete closure at Month 1	14	7.8	8.2	10.4	13.9
25	M	4	JUNCTIONAL NON-HERLITZ	SD-101-6.0	17.9	58	Left Shin, Anterior	0.773	Completed	17.9	25.3	10	15.8	25.3		10.6	11.4	7.5	5.8	8
26	F	16	RECESSIVE DYSTROPHIC	Placebo	11.8	72	Left Lumbar region	1.367	Completed	11.8	14.1	14.4	2.9	0.8		9.5	7.1	7.1	12	5.9
27	F	8	RECESSIVE DYSTROPHIC	Placebo	13.2	60	Right Calf/Ankle posterior	0.849	Completed	13.2	2.6	3.6	2.2	1.8		27.5	26.9	16.25	28.5	10.8
28	M	14	RECESSIVE DYSTROPHIC	SD-101-6.0	20.4	5120	Left Anterior Shin	1.323	Completed	20.4	11	20.7	16	1.7		12.5	23.9	8.5	8.5	8.5
29	F	17	RECESSIVE DYSTROPHIC	SD-101-6.0	25	2922	Left elbow, posterior	1.251	Completed	25	10.9	8.3	3.3	.	Target Wound complete closure at Month 3	23.1	23.1	22.5	22.5	22.5
30	M	16	RECESSIVE DYSTROPHIC	SD-101-6.0	29.2	31	Left Knee, anterior	1.582	Completed	29.2	15	32.8	21.1	38.1		13.6	11.8	12.2	11.5	13
31	F	17	RECESSIVE DYSTROPHIC	SD-101-6.0	35	214	Right Shoulder, posterior	1.64	Completed	35	6.5	4.5	2.7	0.1		8.6	8.2	8.2	8.2	7.3
32	M	8	SIMPLEX	Placebo	10.1	61	Right Buttock, medial	0.986	Completed	10.1	5.2	4.1	2.1	2.7		10	8.5	8.5	10	11.5
33	F	59	JUNCTIONAL NON-HERLITZ	Placebo	10.2	14708	Right Buttock, inferior	1.543	Completed	10.2	9.2	7.5	6.1	5.8		15.5	15.5	15.5	15.9	18.3
34	F	6	RECESSIVE DYSTROPHIC	SD-101-6.0	10	435	Left Clavicular Region	0.686	Completed	10	8.9	6	2.8	1.1		33	22.6	25.2	20.2	20.6
35	M	45	SIMPLEX	SD-101-6.0	10.3	23	Right Knee, Anterior	2.01	Completed	10.3	4.6	.	.	.	Target Wound complete closure at Month 1	35.1	35	31	31	16.9
36	M	6	RECESSIVE DYSTROPHIC	Placebo	12.1	23	Right Ankle Flexure	0.624	Completed	12.1	2.8	.	.	.	Target Wound complete closure at Month 1	3.5	4.9	4.2	7.8	16.5
37	M	28	SIMPLEX	Placebo	16.8	31	Right Calf	1.974	Completed	16.8	1.7	0.4	.	.	Target Wound complete closure at Month 2	3.81	7.35	5.95	5.7	19.6
38	F	9	RECESSIVE DYSTROPHIC	SD-101-6.0	24.4	205	Left Hand, Lateral	0.838	Completed	24.4	21.3	14.7	12.8	10.4		47	41	41.5	42.5	46.5
39	M	17	RECESSIVE DYSTROPHIC	Placebo	13.7	61	Left Lateral Neck	1.414	Completed	13.7	1.7	0.4	.	.	Target Wound complete closure at Month 2	43	37	26	23	20.5
40	M	12	RECESSIVE DYSTROPHIC	SD-101-6.0	36	30	Right Knee, Anterior	0.928	Completed	36	19.6	23	19.3	31.5		39.5	44.5	31.6	27.1	26.1
41	M	6	RECESSIVE DYSTROPHIC	Placebo	28.5	1461	Left Buttock, Superior	0.764	Completed	28.5	29.6	24.2	27.3	30.3		11	10.5	9	9	9
42	F	9	RECESSIVE DYSTROPHIC	Placebo	32.2	61	Left Posterior Thigh	0.781	Completed	32.2	21.1	3.7	34.9	16.2		44	41.5	33.5	33.5	34.2
43	F	21	JUNCTIONAL NON-HERLITZ	SD-101-6.0	26.7	881	Right Buttock	1.541	Discontinued	26.7	.	.	.	.		32	.	.	.	.
44	F	12	RECESSIVE DYSTROPHIC	Placebo	22.7	61	Left Axilla	0.985	Completed	22.7	8	11.8	15	7.2		39.5	35.8	32.3	32.4	29
45	F	9	RECESSIVE DYSTROPHIC	SD-101-6.0	45.3	3452	Right Knee, Anterior	0.884	Completed	45.3	56.5	34.9	20.6	28.5		33.5	33.5	26	23.5	36.5
46	M	6	RECESSIVE DYSTROPHIC	Placebo	17.9	120	Right Knee , Anterior	0.781	Completed	17.9	7.2	10	1.8	8		33	34.5	34	30.5	28
47	M	14	RECESSIVE DYSTROPHIC	SD-101-6.0	30.3	182	Left Knee, Anterior	0.987	Completed	30.3	20.5	14.7	13.5	5.1		62	60	60	64	64
48	F	18	RECESSIVE DYSTROPHIC	Placebo	33.9	211	Right Thoracic Region	1.243	Completed	33.9	10.8	12.2	.	.	Target Wound complete closure at Month 2	41	32	61.8	59	67.5
49	M	12	RECESSIVE DYSTROPHIC	SD-101-6.0	17.8	34	Left Knee, Anterior	0.868	Completed	17.8	6.7	1.4	.	.	Target Wound complete closure at Month 2	73.5	53.8	53.8	53.8	54
50	F	10	RECESSIVE DYSTROPHIC	Placebo	25.3	165	Abdomen, midline -upper	.	Discontinued	25.3	15.6	14	.	.		93.3	70	73	.	.
51	F	27	RECESSIVE DYSTROPHIC	Placebo	12.8	414	Lumbar Region	1.332	Discontinued	12.8	.	.	.	.		26	.	.	.	.
52	F	42	JUNCTIONAL NON-HERLITZ	Placebo	10.1	6711	Left Ankle flexure	1.719	Completed	10.1	7.4	6.3	.	6.7		9.9	9.1	8.6	.	8.7
53	F	21	RECESSIVE DYSTROPHIC	SD-101-6.0	20.2	31	Right Thigh, posterior	1.371	Completed	20.2	.	.	.	.	Target Wound complete closure at Week 2	33.2	41.3	42.6	45.1	29.5
54	F	17	RECESSIVE DYSTROPHIC	SD-101-6.0	37.4	159	Right Medial, extremity	1.261	Discontinued	37.4	.	.	.	.		62.5	.	.	.	.
55	F	37	RECESSIVE DYSTROPHIC	Placebo	15.3	152	Right Axilla	1.424	Completed	15.3	1	1	2.5	2.4		17.4	19.5	21	22.5	17.6
56	F	67	JUNCTIONAL NON-HERLITZ	Placebo	13.5	8	Left Foot, Lateral	1.568	Completed	13.5	4.3	2.9	.	.	Target Wound complete closure at Month 2	13.2	14	12.9	13.6	13.2
57	F	64	JUNCTIONAL NON-HERLITZ	SD-101-6.0	98.4	2808	Left Buttock, Lateral	1.672	Completed	98.4	94.5	.	92.4	87.7		4.5	4.6	4.2	4.2	4.2
58	M	12	RECESSIVE DYSTROPHIC	SD-101-6.0	26	23	Right Knee, Anterior	0.994	Completed	26	6.2	19.7	.	.	Target Wound complete closure at Month 2	7.5	6.55	6.95	6.35	6.55
59	F	1	RECESSIVE DYSTROPHIC	Placebo	18	185	Left Knee, Anterior	0.427	Completed	18	7.9	3.6	.	.	Target Wound complete closure at Month 2	6.3	9.6	9.2	8.6	9.7
60	M	4	RECESSIVE DYSTROPHIC	SD-101-6.0	10.7	28	Right Knee, Lateral	0.638	Completed	10.7	5.5	2.6	.	.	Target Wound complete closure at Month 2	5.4	4.4	7.2	6.7	7.1
61	F	10	RECESSIVE DYSTROPHIC	Placebo	34.6	34	Sternum, Anterior	0.704	Completed	34.6	34.9	41.3	38	25.9		22.5	21	25.4	25.4	24.8
62	F	6	RECESSIVE DYSTROPHIC	SD-101-6.0	12.6	40	Right Lateral Thoracic	0.75	Discontinued	12.6	1.6	5.3	.	.		16.2	15.1	14.7	.	.
63	F	16	RECESSIVE DYSTROPHIC	Placebo	15.1	52	Thoracic Spine	0.944	Completed	15.1	3.2	1.1	0.1	.	Target Wound complete closure at Month 3	16	13.4	9.5	9.5	10.4
64	F	12	RECESSIVE DYSTROPHIC	SD-101-6.0	15.4	130	Right Lumbar Region	0.946	Completed	15.4	3.8	5.8	1.5	1.3		25	20	20	20.5	24.5
65	M	19	RECESSIVE DYSTROPHIC	SD-101-6.0	10.6	29	Thoracic Spine	1.65	Completed	10.6	.	.	.	.	Target Wound complete closure at Week 2	17.6	12.7	6.1	5.5	5.65
66	F	6	RECESSIVE DYSTROPHIC	Placebo	10	21	Abdomen, RUQ	0.36	Completed	10	.	.	.	.	Target Wound complete closure at Week 2	10.5	4.2	3.5	9	9.2
67	F	25	JUNCTIONAL NON-HERLITZ	Placebo	20.6	29	Shin	1.581	Completed	20.6	10.2	.	.	.	Target Wound complete closure at Month 1	.	28	22.4	22.4	22.4
68	M	11	RECESSIVE DYSTROPHIC	Placebo	23.6	27	Lower right leg, lateral	1.018	Completed	23.6	8.8	9.4	.	.	Target Wound complete closure at Month 2	28.4	21.7	21.4	12.5	10.4
69	F	28	JUNCTIONAL NON-HERLITZ	SD-101-6.0	19.9	3039	Left ear, posterior	1.726	Completed	19.9	20.8	17.3	2.4	1.3		28.3	22	20.1	18.6	14
70	M	22	JUNCTIONAL NON-HERLITZ	SD-101-6.0	16.4	400	Left lower leg, medial	2.068	Completed	16.4	16.7	13.7	9	3.6		7.9	7.65	6.45	5.2	4.4
71	F	20	RECESSIVE DYSTROPHIC	Placebo	11.8	130	Right thigh, posterior	1.521	Completed	11.8	3.4	6.6	0.5	.	Target Wound complete closure at Month 3	37.7	23.3	22.4	20.5	18.65
72	F	26	JUNCTIONAL NON-HERLITZ	Placebo	12.5	204	Right Axilla	1.543	Completed	12.5	9.9	4.7	1.5	0.2		16.3	16.5	15.7	17.7	20.5
73	M	53	JUNCTIONAL NON-HERLITZ	SD-101-6.0	12.3	189	Right lower leg, lateral	2.107	Completed	12.3	16	10.6	7.7	13.1		4	2.8	2.4	2.4	3.2
74	M	40	JUNCTIONAL NON-HERLITZ	SD-101-6.0	21.9	122	Left back, scapular region	1.889	Completed	21.9	5.2	3.9	4.5	7.3		46.5	38.5	33.7	31.1	30
75	M	10	JUNCTIONAL NON-HERLITZ	Placebo	34.3	102	Right Knee, anterior	0.846	Discontinued	34.3	23.3	29.9	.	.		48.5	48.3	44.5	.	.
76	M	10	RECESSIVE DYSTROPHIC	SD-101-6.0	11.3	1203	Left shin	1.04	Completed	11.3	7.3	3.2	6.9	0.4		22.9	22.9	22.8	22.1	25
77	F	2	JUNCTIONAL NON-HERLITZ	Placebo	11.9	768	Left ankle flexure	0.455	Completed	11.9	5.4	5	3.2	.	Target Wound complete closure at Month 3	.	5.2	4.8	2.2	3.5
78	F	6	JUNCTIONAL NON-HERLITZ	SD-101-6.0	16	2510	Right calf, anterior	0.771	Completed	16	25.1	8.4	.	.	Target Wound complete closure at Month 2	23.7	20.65	8.1	13.5	11
79	M	9	RECESSIVE DYSTROPHIC	Placebo	13.3	3459	Right knee, anterior	1.018	Completed	13.3	4.8	53.4	70.5	44.4		10.3	9.4	8.9	8.9	12.1
80	M	1	RECESSIVE DYSTROPHIC	SD-101-6.0	11.4	647	Left ankle flexure	0.545	Completed	11.4	3.2	4.6	5.1	1.4		8	8	8.65	11.5	6.5
81	F	9	RECESSIVE DYSTROPHIC	Placebo	28.9	175	Left shoulder, posterior	0.825	Completed	28.9	10.4	3	0.6	.	Target Wound complete closure at Month 3	9.5	10	8	10.3	12
82	F	31	JUNCTIONAL NON-HERLITZ	Placebo	36	30	Right breast, anterior	1.423	Completed	36	13.3	.	.	.	Target Wound complete closure at Month 1	70.5	54.2	7.5	4.4	1.3
83	M	15	RECESSIVE DYSTROPHIC	SD-101-6.0	18	34	Left knee, anterior	1.254	Completed	18	12.8	11	24.6	5		24	27.2	19.5	29.7	32.6
84	M	19	RECESSIVE DYSTROPHIC	SD-101-6.0	17.7	110	Lower left leg, lateral	1.526	Completed	17.7	1.9	.	.	.	Target Wound complete closure at Month 1	47	23.8	23	20.9	26.9
85	F	16	RECESSIVE DYSTROPHIC	Placebo	34.5	3616	Left back, thoracic	1.114	Completed	34.5	28.3	26.1	69.3	.		29.6	28.3	41.1	34.1	15
86	M	33	JUNCTIONAL NON-HERLITZ	SD-101-6.0	14.1	26	Right lateral malleous	1.684	Discontinued	14.1	6	.	.	.	Target Wound complete closure at Month 1	48.5	61.5	38.5	28.1	.
87	M	25	JUNCTIONAL NON-HERLITZ	SD-101-6.0	33.1	35	Left lower leg, medial	1.673	Completed	33.1	10.6	.	.	.	Target Wound complete closure at Month 1	16.5	29	34.5	34.5	9.7
88	F	30	JUNCTIONAL NON-HERLITZ	Placebo	10.4	83	Right buttock	1.544	Completed	10.4	10	14.8	.	.	Target Wound complete closure at Month 3	29.1	32.5	27.6	.	26.5
89	M	25	RECESSIVE DYSTROPHIC	Placebo	17.6	35	Left breast, anterior	1.523	Completed	17.6	.	7.1	2.5	.		37.1	.	42	44	44
90	F	54	RECESSIVE DYSTROPHIC	SD-101-6.0	10.4	21	Left back, thoracic	1.548	Completed	10.4	0.5	1.2	.	.	Target Wound complete closure at Month 2	32.2	34.2	62	47.5	47.5
91	M	19	RECESSIVE DYSTROPHIC	SD-101-6.0	11.1	370	Right shoulder, posterior	1.411	Completed	11.1	4.9	.	.	.	Target Wound complete closure at Month 1	34.5	34.5	40.2	43.2	38
92	M	8	RECESSIVE DYSTROPHIC	Placebo	10	45	Abdomen, mid-upper	0.7	Completed	10	20.1	2.2	1.4	6.9		16.7	23.2	26.2	27.7	28
93	M	4	JUNCTIONAL NON-HERLITZ	SD-101-6.0	11.7	29	Lower right leg lateral	0.629	Completed	11.7	.	.	.	.	Target Wound complete closure at Week 2	56	43	61	66	70
94	F	11	RECESSIVE DYSTROPHIC	Placebo	25.2	66	Right back thoracic	0.96	Completed	25.2	6.8	14.9	1.4	20.2		12.5	.	7.9	6.6	15
95	M	21	RECESSIVE DYSTROPHIC	SD-101-6.0	8.1	38	Left knee, anterior	1.387	Completed	8.1	4.1	2.7	0.4	6.9		11.1	10.1	10.2	9.6	12.3
96	F	7	RECESSIVE DYSTROPHIC	Placebo	7.8	30	Right lower leg, medial	0.721	Completed	7.8	2.7	3	.	.	Target Wound complete closure at Month 2	7.6	5.8	5.9	3.8	2.4
97	F	26	RECESSIVE DYSTROPHIC	Placebo	25.3	30	Right thigh, posterior	1.452	Completed	25.3	4	2.1	.	.	Target Wound complete closure at Month 2	10.7	21.5	16.7	12.7	19.5
98	M	9	RECESSIVE DYSTROPHIC	Placebo	10.6	81	Abdomen, LLQ	0.415	Completed	10.6	.	.	.	.	Target Wound complete closure at Week 2	15	10.1	8.2	9	8
99	M	3	JUNCTIONAL NON-HERLITZ	Placebo	12.7	25	Right anterior thigh	0.631	Completed	12.7	2.7	.	.	.	Target Wound complete closure at Month 1	37.5	33.6	30.6	.	31.3
100	F	3	JUNCTIONAL NON-HERLITZ	SD-101-6.0	14.3	1196	Right anterior thigh	0.633	Completed	14.3	8.6	11.7	.	9.9		17	9.1	8.4	.	5.8
101	M	11	RECESSIVE DYSTROPHIC	Placebo	15.5	1231	Left shoulder, superior	1.073	Completed	15.5	47.5	15.4	24.2	23.5		36	26	20.5	17	18
102	M	13	RECESSIVE DYSTROPHIC	Placebo	28.4	240	Right foot, dorsum	1.107	Discontinued	28.4	16.2	14.6	.	.		8.1	24.7	22.8	24.9	.
103	M	2	SIMPLEX	SD-101-6.0	13.9	1039	Left foot, sole	0.581	Completed	13.9	10.6	10.1	3.1	4.1		2.05	1.09	0.82	1.75	1.35
104	M	6	SIMPLEX	SD-101-6.0	10.1	36	Right foot, sole	0.738	Discontinued	10.1	.	.	.	.		20	7.2	.	.	.
105	M	7	SIMPLEX	Placebo	20.1	31	Right upper arm, anterior	0.896	Completed	20.1	15.4	8.7	5.2	0.8		8.5	7.4	9.2	7.2	9.9
106	M	39	JUNCTIONAL NON-HERLITZ	Placebo	45.4	1078	Left thigh medial inner	2.258	Completed	45.4	37.8	38.9	44.7	31.8		26.7	27.9	27.2	27.8	28.2
107	F	48	JUNCTIONAL NON-HERLITZ	SD-101-6.0	14.6	105	Left forearm, lateral	2.003	Completed	14.6	9.3	1	0.3	.	Target Wound complete closure at Month 3	67.5	67.5	67.5	66.5	66.5
108	F	8	SIMPLEX	Placebo	13.6	93	Left knee, anterior	0.439	Completed	13.6	14.2	0.6	.	.	Target Wound complete closure at Month 2	17.8	17.5	19.4	12.8	14.3
109	F	3	RECESSIVE DYSTROPHIC	Placebo	15.9	86	Right Elbow posterior	0.644	Completed	15.9	11.1	2.8	2.9	8.1		6.2	5.2	5.1	5.49	3.8
110	F	11	JUNCTIONAL NON-HERLITZ	Placebo	16.2	4262	Right medial malleolus	1.02	Completed	16.2	19.6	16.8	18.9	8.2		84.5	85	85	84	20.5
111	F	9	RECESSIVE DYSTROPHIC	SD-101-6.0	10.1	23	Right medial malleolus	0.868	Discontinued	10.1	0.5	.	.	.	Target Wound complete closure at Month 1	66.8	69	53	52	.
112	F	16	RECESSIVE DYSTROPHIC	Placebo	16	35	Right Shoulder anterior	.	Completed	16	14.3	15.6	46.9	29.1		68	66	68	52.5	56
113	F	9	RECESSIVE DYSTROPHIC	Placebo	25	391	Right back, thoracic	0.837	Completed	25	10.8	8.2	2	2		12	10	15.3	17	20
114	F	11	RECESSIVE DYSTROPHIC	SD-101-6.0	10.2	96	Right clavicular region	0.894	Completed	10.2	.	.	.	.	Target Wound complete closure at Week 2	31	27.5	31.5	24	27
115	M	2	RECESSIVE DYSTROPHIC	SD-101-6.0	18.8	32	Right back lumbar region	0.533	Completed	18.8	3.4	.	.	.	Target Wound complete closure at Month 1	45	41	42.5	33.5	35
116	M	8	RECESSIVE DYSTROPHIC	Placebo	35.2	191	Left buttock	0.78	Completed	35.2	19.3	3.8	65.7	12.9		47	43	52	52	57.5
117	M	12	RECESSIVE DYSTROPHIC	SD-101-6.0	10.6	64	Right knee, anterior	1.046	Completed	10.6	2.4	1.5	.	.	Target Wound complete closure at Month 2	15.5	11.4	10.8	10.4	11
118	F	15	RECESSIVE DYSTROPHIC	SD-101-6.0	23.6	22	Left lateral thorax	0.924	Completed	23.6	8.2	1.5	2.6	0.2		48	52	51	51	49.5
119	M	7	RECESSIVE DYSTROPHIC	Placebo	10.1	72	Left Lateral malleolus	0.765	Completed	10.1	.	.	.	.	Target Wound complete closure at Week 2	29.5	28.5	23	27.5	25.4
120	M	5	RECESSIVE DYSTROPHIC	SD-101-6.0	20.3	86	Right back lumbar region	0.716	Completed	20.3	3.1	5.5	0.6	15.1		48	48	48	48	48
121	M	7	RECESSIVE DYSTROPHIC	Placebo	302	42	SF	0.751	Discontinued	302	.	.	.	.		62	.	.	.	.
122	F	2	RECESSIVE DYSTROPHIC	Placebo	11.4	42	Right thigh, anterior	0.47	Completed	11.4	1	.	.	.	Target Wound complete closure at Month 1	48	37	50	44	36
123	F	2	RECESSIVE DYSTROPHIC	SD-101-6.0	30	28	Right thigh, lateral	0.472	Completed	30	22.4	.	.	.	Target Wound complete closure at Month 1	45	14	11	10	7.6
124	M	28	RECESSIVE DYSTROPHIC	SD-101-6.0	21.7	31	Right hand, dorsum	1.445	Completed	21.7	25.1	24	24.4	19.3		64.5	64.5	64	64	64
125	M	12	RECESSIVE DYSTROPHIC	SD-101-6.0	13.6	66	Right lower leg, medial	1.644	Completed	13.6	13.3	.	.	.	Target Wound complete closure at Month 1	33	29	23.5	23.5	29.5
126	F	2	RECESSIVE DYSTROPHIC	SD-101-6.0	22.8	31	Abdomen, RLQ	0.521	Completed	22.8	.	.	.	.	Target Wound complete closure at Week 2	72	47	33	45	44
127	M	8	RECESSIVE DYSTROPHIC	Placebo	16.4	31	Right lower leg, medial	0.751	Completed	16.4	4.2	15.6	10.1	.	Target Wound complete closure at Month 3	69	71	62	64.5	62.5
128	M	3	RECESSIVE DYSTROPHIC	Placebo	35.6	21	Left upper arm, lateral	0.636	Discontinued	35.6	.	.	.	.		29	.	.	.	.
129	F	23	RECESSIVE DYSTROPHIC	SD-101-6.0	15.7	31	Lower left leg, lateral	1.394	Completed	15.7	28.5	4	.	.	Target Wound complete closure at Month 2	56	56	56	57	57
130	F	34	RECESSIVE DYSTROPHIC	SD-101-6.0	11.3	28	Right foot, sole	1.5	Completed	11.3	4.1	.	.	.	Target Wound complete closure at Month 1	51	51	43	43	43
131	M	11	RECESSIVE DYSTROPHIC	Placebo	13.1	365	Perineum	1.437	Completed	13.1	9.1	10	11.6	9.2		4.1	4	4	4	4
132	F	8	RECESSIVE DYSTROPHIC	Placebo	19.5	21	Left back thoracic Region	0.759	Completed	19.5	15.5	3.4	.	.	Target Wound complete closure at Month 2	38	37	35	35	35
133	M	2	JUNCTIONAL NON-HERLITZ	SD-101-6.0	14.8	24	Right upper arm anterior	.	Completed	14.8	1.2	.	.	.	Target Wound complete closure at Month 1	36	36	40	.	54
134	F	2	RECESSIVE DYSTROPHIC	SD-101-6.0	10.8	29	Left ankle flexure	0.435	Discontinued	10.8	2	0.3	0.2	.		18.5	34	32	33	.
135	M	14	JUNCTIONAL NON-HERLITZ	Placebo	10	52	Right lateral thigh	1.129	Completed	10	.	.	.	.	Target Wound complete closure at Week 2	48	48.5	44	41.5	42
136	M	17	RECESSIVE DYSTROPHIC	SD-101-6.0	41.9	23	Right knee, anterior	.	Completed	41.9	10.4	1.3	.	.	Target Wound complete closure at Month 2	18.5	17	17.5	17.8	16.5
137	M	15	JUNCTIONAL NON-HERLITZ	Placebo	11.6	21	Left Lateral malleolus	1.499	Completed	11.6	10.8	0.4	.	.	Target Wound complete closure at Month 2	13.5	13.5	18	17.5	18.5
138	M	26	JUNCTIONAL NON-HERLITZ	Placebo	11	24	Right lower leg medial	1.673	Completed	11	3.2	.	.	.	Target Wound complete closure at Month 1	20.5	19.5	21	21	22.7
139	M	29	RECESSIVE DYSTROPHIC	Placebo	16.9	217	Left back, thoracic	1.623	Completed	16.9	8.2	3.2	1.5	6.6		38.4	30.5	31.3	28.5	23.02
140	M	8	RECESSIVE DYSTROPHIC	SD-101-6.0	14.5	28	Right Shin, below R knee	1.041	Completed	14.5	1.6	.	.	.	Target Wound complete closure at Month 1	19.5	38	35.5	27.9	31.49
141	M	22	JUNCTIONAL NON-HERLITZ	SD-101-6.0	26.4	105	Right Shin prox. 1/3	1.522	Completed	26.4	30.3	27.9	12.5	36.4		28.25	21.6	19.5	16.27	18.99
142	F	48	RECESSIVE DYSTROPHIC	Placebo	12.2	27	Neck posterior left	1.47	Completed	12.2	.	.	.	.	Target Wound complete closure at Week 2	16.29	14	7.48	11.2	11.96
143	F	2	SIMPLEX	SD-101-6.0	15.9	210	Neck anterior left	0.539	Completed	15.9	10.4	.	.	.	Target Wound complete closure at Month 1	10.97	8.75	11.89	8.23	9.96
144	F	43	JUNCTIONAL NON-HERLITZ	Placebo	17.4	322	Left trochanter	1.573	Completed	17.4	9.5	6.4	.	.	Target Wound complete closure at Month 2	44.5	43	32.5	28.4	35.85
145	F	5	RECESSIVE DYSTROPHIC	SD-101-6.0	12.4	30	Right upper arm medial	0.504	Completed	12.4	.	.	.	.	Target Wound complete closure at Week 2	26.18	20.94	19.7	24.7	21.96
146	M	2	RECESSIVE DYSTROPHIC	Placebo	10.3	30	Left Hand dorsum	0.407	Completed	10.3	2.1	10.5	.	.	Target Wound complete closure at Month 2	28.69	13.49	14.55	18.4	18.6
147	F	2	RECESSIVE DYSTROPHIC	Placebo	10.6	90	Right lower abdomen	0.445	Completed	10.6	12.3	.	.	.	Target Wound complete closure at Month 1	33.3	33.6	31.5	34.26	28.3
148	M	8	RECESSIVE DYSTROPHIC	SD-101-6.0	10.3	23	Right buttock	0.937	Completed	10.3	.	.	.	.	Target Wound complete closure at Week 2	23	19.05	12.6	14.45	11.6
149	M	3	SIMPLEX	SD-101-6.0	11.4	62	Right forearm, posterior	0.657	Completed	11.4	.	4.4	2.9	.	Target Wound complete closure at Month 3	20.7	.	18.15	12.75	10.3
150	M	7	RECESSIVE DYSTROPHIC	Placebo	10.7	37	Right groin	0.837	Completed	10.7	6.8	0.1	1.5	3.1		9.5	9	7	5.9	6.2
151	M	4	SIMPLEX	SD-101-6.0	11	64	Right foot, sole	0.6	Completed	11	11	10.3	8.5	6		4.2	4.7	4.6	5	5.3
152	M	8	RECESSIVE DYSTROPHIC	SD-101-6.0	10.1	49	Left back, scapular region	0.894	Completed	10.1	1.7	.	.	.	Target Wound complete closure at Month 1	7	5.9	5.1	4.8	4.3
153	M	24	RECESSIVE DYSTROPHIC	Placebo	12.3	30	Left medial malleolus	2.063	Completed	12.3	3.4	0.5	.	.	Target Wound complete closure at Month 2	2.2	2.2	2.2	1.8	1.5
154	M	9	RECESSIVE DYSTROPHIC	Placebo	21	24	Right shin	0.837	Completed	21	6	.	.	.	Target Wound complete closure at Month 1	5	3.9	4.6	4.4	6.9
155	F	14	RECESSIVE DYSTROPHIC	SD-101-6.0	11	26	Left knee medial	0.854	Completed	11	7.5	2.9	9.8	2.7		17.3	9.6	6.1	6.1	5.9
156	M	10	RECESSIVE DYSTROPHIC	SD-101-6.0	13.8	22	Right knee anterior	0.842	Completed	13.8	9.4	3.3	3.1	5.9		9.9	7.5	5.7	6.5	9
157	M	6	RECESSIVE DYSTROPHIC	Placebo	43.1	24	Right thigh anterior	0.672	Completed	43.1	20.3	22.5	6.6	5.3		15.9	7.6	5.5	5.8	7.5
158	M	3	RECESSIVE DYSTROPHIC	SD-101-6.0	11.8	22	Right knee anterior	0.654	Completed	11.8	2.9	4	.	.	Target Wound complete closure at Month 2	7.9	3.1	2.1	2.1	2.7
159	F	12	RECESSIVE DYSTROPHIC	Placebo	10.7	23	Left foot sole	1.249	Completed	10.7	1.4	.	.	.	Target Wound complete closure at Month 1	6.9	5.5	2.5	3.9	4
160	M	9	RECESSIVE DYSTROPHIC	Placebo	13.8	26	Right foot sole	0.696	Completed	13.8	0.7	1.6	3.2	.	Target Wound complete closure at Month 3	12.8	5.3	3.6	4.3	3.6
161	M	6	RECESSIVE DYSTROPHIC	SD-101-6.0	11.8	36	Right Buttock	0.759	Completed	11.8	.	.	.	.	Target Wound complete closure at Week 2	6.4	3.6	2.5	1.9	2.1
162	F	15	RECESSIVE DYSTROPHIC	Placebo	12.4	90	Left shoulder lateral	0.948	Completed	12.4	7.4	4.4	3.7	5.1		26.6	15.1	13.1	11.3	11
163	M	14	RECESSIVE DYSTROPHIC	SD-101-6.0	29	29	Right knee lateral	1.024	Completed	29	9.7	6.6	16	2.8		26.1	18.9	22.2	18.7	22.7
164	F	3	RECESSIVE DYSTROPHIC	Placebo	12.9	27	Right clavicular region	0.51	Completed	12.9	2.1	0.5	.	.	Target Wound complete closure at Month 2	37.6	17.5	17.4	15.3	13.1
165	M	9	RECESSIVE DYSTROPHIC	SD-101-6.0	15.2	108	Left knee anterior	0.978	Completed	15.2	9	38.3	9.7	3.2		43.5	27.7	25	17.7	14.5
166	M	25	RECESSIVE DYSTROPHIC	Placebo	16.5	28	Left Shoulder superior	1.581	Completed	16.5	5.3	.	.	.	Target Wound complete closure at Month 1	11.6	7	4.9	4.2	5.8
167	F	12	RECESSIVE DYSTROPHIC	Placebo	45.2	723	Right forearm circumferenti al	0.702	Completed	45.2	48.2	46.3	44.2	35.7		36.5	25.4	18	13.2	12.7
168	M	13	RECESSIVE DYSTROPHIC	SD-101-6.0	13.5	33	Left knee lateral	1.081	Completed	13.5	2.8	6.9	1.4	1		17.1	10.1	8	6.7	7.3
169	M	18	RECESSIVE DYSTROPHIC	SD-101-6.0	10.9	40	Right thigh posterior	1.234	Completed	10.9	3.7	0.7	0.4	0.5		15.8	7.8	6.2	8.7	10.6
